# Supplementary material for: Clients’ Preferences for Family Involvement and Subsequent Family Contact Patterns Within OnTrackNY Early Psychosis Services
Source: Atypon-hosted journal article supplement (doi:10.1176/appi.ps.202000241), 2021-02-03
Supplement: appi.ps.202000241.ds001.pdf [file appi.ps.202000241.ds001.pdf]

## Supplemental Information

### Variables and Variable Structure

#### Sociodemographic Variables:

- Age (continuous)
- Gender (male, female)
- Race (white, black, Asian, other) and ethnicity (Hispanic and non-Hispanic)
- Highest education completed (did not graduate from high school, high school completion or GED, some college, college/post-graduate)
- Fluency in English (yes/no)
- Insurance status (uninsured, private, public, other/unknown)

#### Family and Support System Variables:

- Client contact with family (daily, weekly, monthly or less)
- Living situation (lives with parents, other family, alone, other)
- Lives with anyone (yes/no)
- Has a designated support person (yes/no)
- Homeless within the past three months (yes/no)

#### Functioning and Clinical Status Variables:

- Ever hospitalized (yes/no)
- Number of prior hospitalizations
- Medication adherence as per prescribing clinician (not adherent, adherent, not prescribed, unknown)
- Median of time to first mental health contact
- Family involvement in pathways to care (yes/no)
- Any substance use (yes, no)
- Employment (yes/no)
- Educational enrollment (yes/no)
